# Supplementary material for: Preparation of molecularly imprinted polymeric microspheres based on distillation–precipitation polymerization for an ultrasensitive electrochemical sensor
Source: Royal Society of Chemistry journal article supplement (doi:10.1039/c7an00059f), 2017-01-01
Supplement: c7an00059f1.pdf [file c7an00059f1.pdf]

# **Preparation of molecularly imprinted polymeric microspheres based on distillation-precipitation polymerization for ultrasensitive electrochemical sensor**

Yuan Liu,<sup>a, 1</sup> Lu Zhang,<sup>b, 1</sup> Na Zhao,<sup>b</sup> Yajie Han,<sup>c</sup> Feilang Zhao,<sup>d</sup> Zhengchun Peng<sup>e</sup>  
and Yingchun Li<sup>a, b, \*</sup>

<sup>a</sup>. *School of Science, Harbin Institute of Technology (Shenzhen), Shenzhen 518055, China*

<sup>b</sup>. *Key Laboratory of Xinjiang Phytomedicine Resources of Ministry of Education, School of Pharmacy, Shihezi University, Shihezi 832000, China*

<sup>c</sup>. *Key Laboratory for Green Processing of Chemical Engineering of Xinjiang Bingtuan, School of Chemistry and Chemical Engineering, Shihezi University, Shihezi 832003, China*

<sup>d</sup>. *Jiangsu Devote Instrumental Science & Technology Co., Ltd., Huai'an, Jiangsu, 223001, China*

<sup>e</sup>. *College of Optoelectronic Engineering, Shenzhen University, Shenzhen 518060, China*

<sup>1</sup>. *These authors contributed equally to this work.*

\*Corresponding author:

Prof. Dr. Yingchun Li, tel: +86-755-86239466, e-mail address: liyingchun@hit.edu.cn

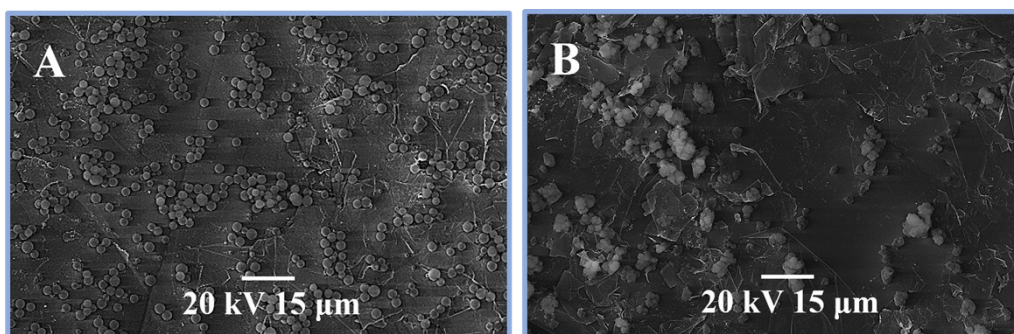

**Fig. S1** SEM images of surface of MIPMSs/CPE (A) and MIPs/CPE (B)
